# Supplementary material for: Visible light active Bi3TaO7 nanosheets for water splitting
Source: Royal Society of Chemistry journal article supplement (doi:10.1039/c9dt01020c), 2019-01-01
Supplement: c9dt01020c1.pdf [file c9dt01020c1.pdf]

## Supplementary Information

### Visible Light Active Bi<sub>3</sub>TaO<sub>7</sub> Nanosheets for Water Splitting

Hadi Razavi-Khosroshahi<sup>a</sup>, Sara Mohammadzadeh<sup>a</sup>, Mirabbos Hojamberdiev<sup>b</sup>, Sho Kitano<sup>c</sup>, Miho Yamauchi<sup>c,d</sup>, Masayoshi Fujii<sup>a\*</sup>

<sup>a</sup> Advanced Ceramics Research Center, Nagoya Institute of Technology, Gifu, Japan.

<sup>b</sup> Department of Materials Physics, Faculty of Engineering, Nagoya University, Nagoya, Japan.

<sup>c</sup> Department of Chemistry, Faculty of Sciences, Kyushu University, Fukuoka, Japan

<sup>d</sup> International Institute for Carbon-Neutral Energy Research (WPI-I2CNER), Kyushu University, Fukuoka, Japan

Email: razavi.khosroshahihadi@nitech.ac.jp

hrkhosro@gmail.com

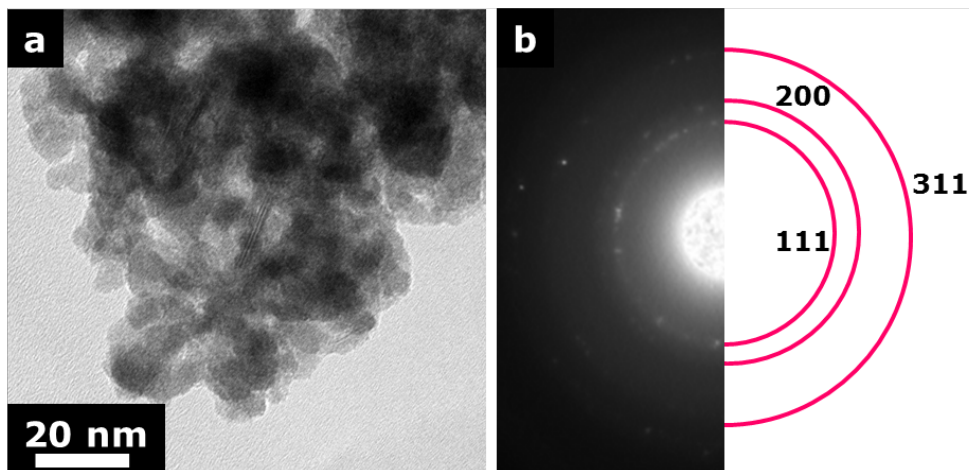

**Figure S1.** (a) Bright-field TEM micrograph of  $\text{Bi}_3\text{TaO}_7$  powder and (b) corresponding SAED pattern.

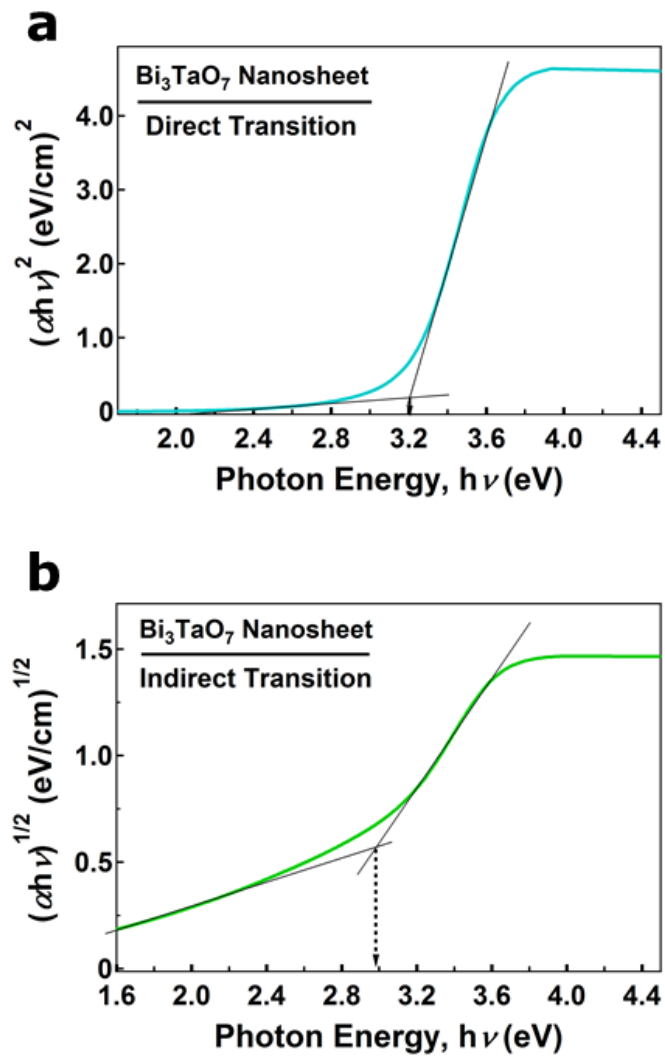

**Figure S2.** (a) Direct band gap, and (b) indirect band gap estimation of nanosheets based on Tauc plot.

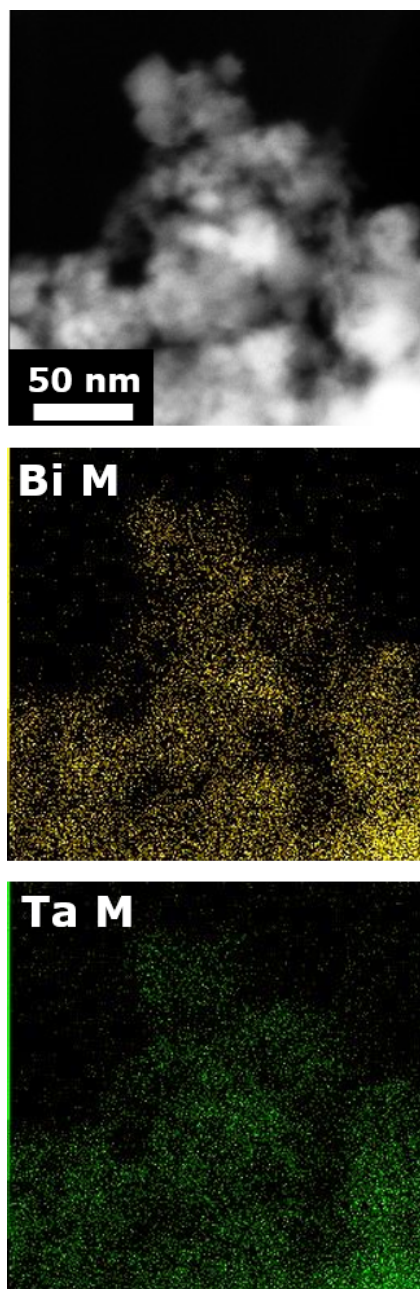

**Figure S3.** High-angle annular dark field scanning transmission electron microscope image of  $\text{Bi}_3\text{TaO}_7$  powder, and corresponding EDS elemental mapping of Bi-M and Ta-M.

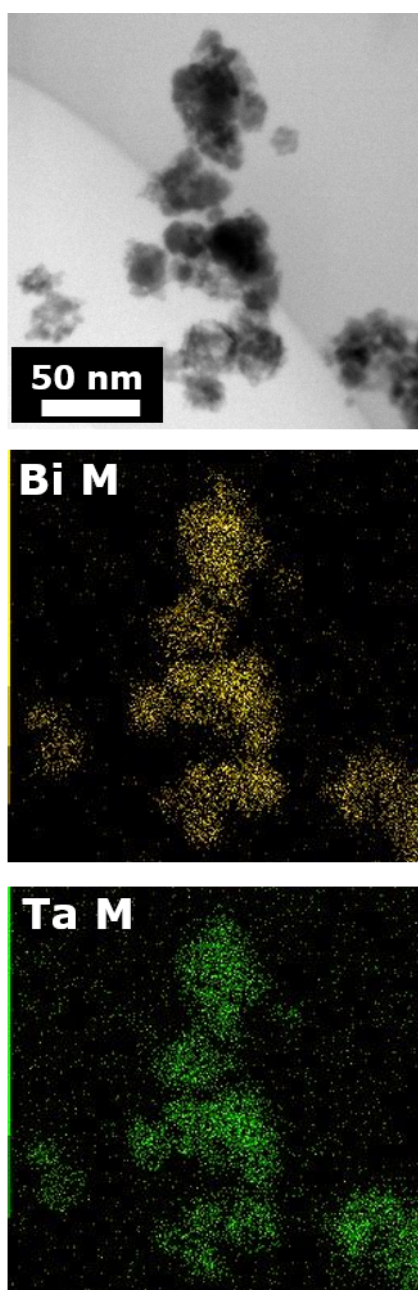

**Figure S4.** Bright-field scanning transmission electron microscope image of  $\text{Bi}_3\text{TaO}_7$  nanosheets, and corresponding EDS elemental mapping of Bi-M and Ta-M.

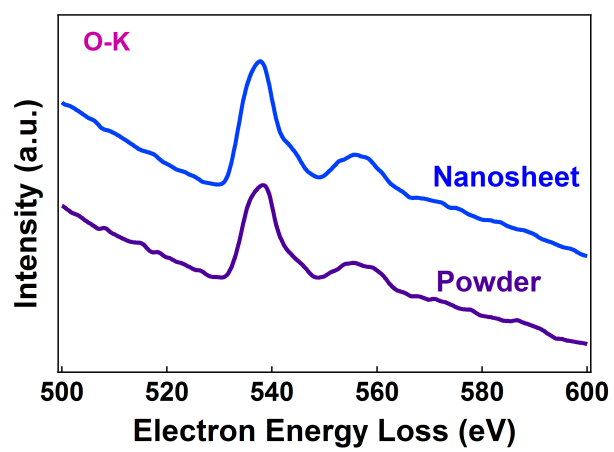

**Figure S5.** EEL spectra of O-K edges for Bi<sub>3</sub>TaO<sub>7</sub> powder and nanosheet.

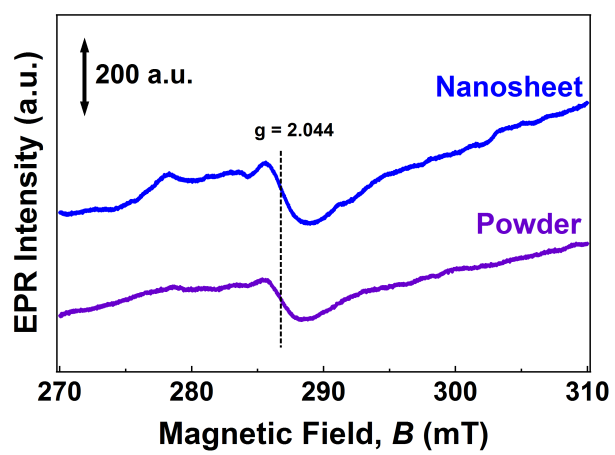

**Figure S6.** EPR profile of  $\text{Bi}_3\text{TaO}_7$  powder and nanosheet.

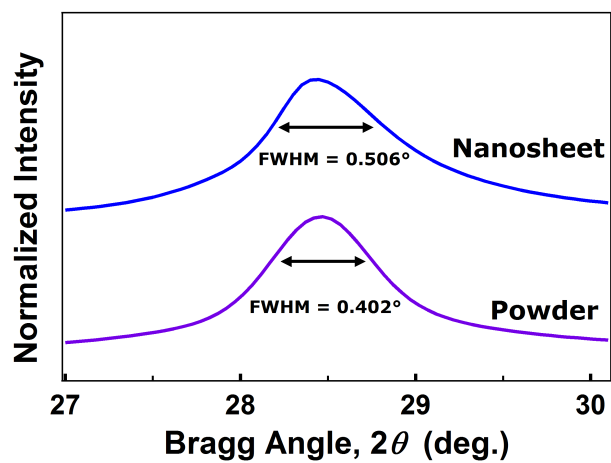

**Figure S7.** Magnified XRD profile of Bi<sub>3</sub>TaO<sub>7</sub> powder and nanosheet at (111) reflection.



Table S1. Element concentration of Bi<sub>3</sub>TaO<sub>7</sub> powder by EDS.

| Element   | EDS Analysis |      |
|-----------|--------------|------|
|           | Wt%          | At%  |
| <b>Bi</b> | 67.4         | 26.5 |
| <b>Ta</b> | 20.1         | 9.1  |
| <b>O</b>  | 12.5         | 64.4 |

Table S2. Element concentration of Bi<sub>3</sub>TaO<sub>7</sub> nanosheet by EDS.

| Element   | EDS Analysis |      |
|-----------|--------------|------|
|           | Wt%          | At%  |
| <b>Bi</b> | 66.5         | 25.7 |
| <b>Ta</b> | 20.6         | 9.2  |
| <b>O</b>  | 12.9         | 65.1 |
